# Supplementary material for: Long distance airborne transmission of SARS-CoV-2: rapid systematic review
Source: PubMed Central journal article supplement — BMJ. 2022 Jun 29;377:e068743. doi: 10.1136/bmj-2021-068743 (PMC9240778; doi:10.1136/bmj-2021-068743), 2022-06-29
Supplement: duvd068743.ww1.pdf [file duvd068743.ww1.pdf]

# Long-distance airborne transmission of SARS-CoV-2: a rapid systematic review

Daphne Duval, Jennifer C Palmer, Isobel Tudge, Nicola Pearce-Smith, Emer O’Connell, Allan Bennett, Rachel Clark

## Supplementary Material 1

|                                             |   |
|---------------------------------------------|---|
| Section 1. Search strategy .....            | 2 |
| Section 2. Quality criteria checklist ..... | 4 |
| Section 3. List of excluded studies .....   | 6 |

## Section 1. Search strategy

### Search strategy Ovid Medline

- 1 exp SARS-CoV-2/
- 2 exp COVID-19/
- 3 (corona\* adj1 (virus\* or viral\*)).tw,kw,kf.
- 4 (CoV not (Coefficient\* or "co-efficien\*" or covalent\* or Covington\* or covariant\* or covarianc\* or "cut-off value\*" or "cutoff value\*" or "cut-off volume\*" or "cutoff volume\*" or "combined optimi?ation value\*" or "central vessel trunk\*" or CoVR or CoVS)).tw,kw,kf.
- 5 (coronavirus\* or 2019nCoV\* or 19nCoV\* or "2019 novel\*" or Ncov\* or "n-cov" or "SARS-CoV-2\*" or "SARSCoV-2\*" or SARSCoV2\* or "SARS-CoV2\*" or "severe acute respiratory syndrome\*" or COVID\*2).tw,kw,kf.
- 6 exp COVID-19 Vaccines/
- 7 exp COVID-19 Testing/
- 8 or/1-7
- 9 (aerosol or aerosols or aerosolized or aerosolised or airborne).ti.
- 10 (airborne or aerosol or aerosols or aerosolized or aerosolised or air flow\* or airflow\* or aerodynamic\* or air condition\* or droplet\* or cough\* or sneez\* or breath\* or sing or singing or shout\* or (air adj2 circulat\*) or (air adj2 recirculation) or (air adj2 re-circulation) or ((viral or virus) adj2 particle\*)).tw,kf.
- 11 (transmission\* or transmit\* or distanc\* or dispers\*).tw,kf.
- 12 10 and 11
- 13 ((ventilation or ventilated) and (transmission\* or distanc\* or dispers\*)).tw,kf.
- 14 ((route or routes or mode or modes) adj2 (transmission\* or transmit\*)).tw,kf.
- 15 (far field and (exposure\* or transmission\* or transmit\*)).tw,kf.
- 16 (long\* distance\* adj2 (transmission\* or transmit\*)).tw,kf.
- 17 Disease Transmission, Infectious/
- 18 10 and 17
- 19 Ventilation/
- 20 Air Conditioning/
- 21 9 or 12 or 13 or 14 or 15 or 16 or 18 or 19 or 20
- 22 8 and 21
- 23 limit 22 to dt=20200727-20220118
- 24 23 not (exp animals/ not humans.sh.)
- 25 limit 24 to english language

## Ovid Embase

- 1 (aerosol or aerosols or aerosolized or aerosolised or airborne).ti.
- 2 (airborne or aerosol or aerosols or aerosolized or aerosolised or air flow\* or aerodynamic\* or air condition\* or droplet\* or cough\* or sneez\* or breath\* or sing or singing or shout\* or (air adj2 circulat\*) or (air adj2 recirculation) or (air adj2 re-circulation) or ((viral or virus) adj2 particle\*)).tw,kf.
- 3 (transmission\* or transmit\* or distanc\* or dispers\*).tw,kf.
- 4 2 and 3
- 5 ((ventilation or ventilated) and (transmission\* or distanc\* or dispers\*)).tw,kf.
- 6 ((route or routes or mode or modes) adj2 (transmission\* or transmit\*)).tw,kf.
- 7 (far field and (exposure\* or transmission\* or transmit\*)).tw,kf.
- 8 (long\* distance\* adj2 (transmission\* or transmit\*)).tw,kf.
- 9 disease transmission/ or virus transmission/
- 10 2 and 9
- 11 room ventilation/
- 12 air conditioning/
- 13 exp airborne transmission/
- 14 1 or 4 or 5 or 6 or 7 or 8 or 10 or 11 or 12 or 13
- 15 exp severe acute respiratory syndrome coronavirus 2/ or coronavirus disease 2019/ or experimental coronavirus disease 2019/
- 16 (corona\* adj1 (virus\* or viral\*)).ti,ab,kf.
- 17 (CoV not (Coefficient\* or co-efficien\* or covalent\* or covington or covariant\* or covarianc\* or "cut-off value\*" or "cutoff value\*" or "cut-off volume\*" or "cutoff volume\*" or "combined optimi?ation value\*" or "central vessel trunk" or CoVR or CoVS)).ti,ab,kf.
- 18 (coronavirus\* or 2019nCoV\* or 19nCoV\* or "2019 novel\*" or Ncov\* or "n-cov" or "SARSCoV-2\*" or "SARSCoV-2\*" or SARSCoV2\* or "SARS-CoV2\*" or "severe acute respiratory syndrome\*" or COVID\*2).ti,ab,kf.
- 19 or/15-18
- 20 14 and 19
- 21 limit 20 to dc=20200727-20220118
- 22 21 not ((exp animal/ or nonhuman/) not exp human/)
- 23 limit 22 to english language

## medRxiv and Arxiv (via NLM Covid portfolio)

aerosol OR aerosols OR aerosoliz\* OR aerosolis\* OR airborne OR "air flow\*" OR airflow\* OR "long\* distance\*" OR "far field" OR "far-field"

## WHO COVID database

(aerosol or aerosols or aerosoliz\* or aerosolis\* or airborne or "air flow\*" or airflow\* or "long\* distance\*" or "far field" or "far-field") AND (transmission or transmit\* or distanc\* or dispers\*)

## Section 2. Quality criteria checklist

The methodological quality of the included studies was assessed using the quality criteria checklist (QCC) for primary research, which is composed of 10 questions based on quality criteria and domains identified by the Agency for Healthcare Research and Quality (AHRQ)<sup>1</sup>. The QCC tool can be applied to most study designs and is therefore suitable for reviews that include different study designs. The original checklist includes sub-questions to specify how each question should be applied to a specific study design, including descriptive studies (available here: [www.anddeal.org/evidence-analysis-manual](http://www.anddeal.org/evidence-analysis-manual)). Each question can be responded with 'yes', 'no', 'unclear' or 'N/A' (not applicable).

We used the sub-questions for descriptive studies to assess the methodological quality of outbreak investigations, although further adjustments had to be made. For instance, for question 2, which assesses selection bias, the sub-question "Were inclusion /exclusion criteria specified?" is not relevant to outbreak investigations and we instead assessed risk of selection bias by considering whether all participants at risk of being exposed at the transmission event(s) had been considered in the investigation. The questions of the QCC tool are presented below, together with the sub-questions we used for outbreak investigations.

For the overall rating, the original QCC tool used 'positive', 'neutral' and 'negative', which we amended to 'high', 'medium' and 'low'. A study was rated as high methodological quality if the answers to the four critical questions (2, 3, 6 and 7) were 'yes' plus at least one of the remaining questions; low if  $\geq 50\%$  of the critical questions answered 'no'; otherwise medium methodological quality.

### QCC tool for outbreak investigations

#### 1. Was the research question clearly stated?

#### 2. Was the selection of study subjects/patients free from bias?

Were all participants at risk of being exposed at the transmission event(s) considered in the investigation?

#### 3. Were study groups comparable?

Descriptive outbreak investigation: N/A

Outbreak investigation with an analytic component (comparison between exposed and non-exposed groups): were groups comparable on important confounding factors and/or were preexisting differences accounted for by using appropriate adjustments in statistical analysis

#### 4. Was method of handling withdrawals described?

Where applicable, was response rate specified?

#### 5. Was blinding used to prevent introduction of bias?

N/A

#### 6. Were intervention/therapeutic regimens/exposure factor or procedure and any comparison(s) described in detail? Were intervening factors described?

Was the investigation thorough enough to be able to assess the likelihood of close contact and fomite transmission?

#### 7. Were outcomes clearly defined and the measurements valid and reliable?

Were symptomatic and asymptomatic cases considered?

Was viral genomic sequencing performed?

#### 8. Was the statistical analysis appropriate for the study design and type of outcome indicators?

Descriptive outbreak investigations: N/A

---

<sup>1</sup> West S, King V, Carey TS, et al. Systems to rate the strength of scientific evidence. US; 2002 April 2002. Report No.: 02-E016 Contract No.: 47.

Outbreak investigation with an analytical component: were statistical analyses adequately described and the results reported appropriately? Were adequate adjustments made for effects of confounding factors that might have affected the outcomes (e.g. multivariate analyses)?

**9. Are conclusions supported by results with biases and limitations taken into consideration?**

Is there a discussion of findings?

Are biases and study limitations identified and discussed?

**10. Is bias due to study's funding or sponsorship unlikely?**

Were sources of funding and investigators' affiliations described?

Was there no apparent conflict of interest?

### Section 3. List of excluded studies

| Retrieval method                                                                                                     | Reference                                                                                                                                                                 | Reason for exclusion      |
|----------------------------------------------------------------------------------------------------------------------|---------------------------------------------------------------------------------------------------------------------------------------------------------------------------|---------------------------|
| Citation screening                                                                                                   | Bae, S. et al. Epidemiological Characteristics of COVID-19 Outbreak at Fitness Centers in Cheonan, Korea                                                                  | Cannot ascertain exposure |
|                                                                                                                      | Benenson, S. et al. High attack rate of COVID-19 in an organized tour group of vaccinated travellers to Iceland                                                           | Wrong exposure            |
|                                                                                                                      | Brllek, A. et al. Possible indirect transmission of COVID-19 at a squash court, Slovenia, March 2020: case report                                                         | Cannot ascertain exposure |
|                                                                                                                      | Capon, A. et al. Risk factors leading to COVID-19 cases in a Sydney restaurant                                                                                            | Cannot ascertain exposure |
|                                                                                                                      | Chiew, C. et al. Investigation of three clusters of COVID-19 in Singapore: implications for surveillance and response measures                                            | Wrong exposure            |
|                                                                                                                      | Danis, K. et al. Cluster of Coronavirus Disease 2019 (COVID-19) in the French Alps, February 2020                                                                         | Wrong exposure            |
|                                                                                                                      | Furuse, Y. et al. Clusters of Coronavirus Disease in Communities, Japan, January-April 2020                                                                               | Wrong study design        |
|                                                                                                                      | Hatfield, K. et al. Asymptomatic and Presymptomatic SARS-CoV-2 Infections in Residents of a Long-Term Care Skilled Nursing Facility - King County, Washington, March 2020 | Wrong exposure            |
|                                                                                                                      | Hedges, S. et al. High COVID-19 Attack Rate Among Attendees at Events at a Church - Arkansas, March 2020                                                                  | Wrong exposure            |
|                                                                                                                      | Herstein, J. et al. Characteristics of SARS-CoV-2 Transmission among Meat Processing Workers in Nebraska, USA, and Effectiveness of Risk Mitigation Measures              | Wrong exposure            |
|                                                                                                                      | Kain, D. et al. A Longitudinal, Clinical, and Spatial Epidemiologic Analysis of a Large COVID-19 Long-Term Care Home Outbreak                                             | Wrong exposure            |
|                                                                                                                      | Karumanagoundar, K. et al. Secondary attack rate of COVID-19 among contacts and risk factors, Tamil Nadu, March-May 2020: a retrospective cohort study                    | Wrong study design        |
|                                                                                                                      | Kennedy, E. et al. COVID-19 Outbreak Among Employees at a Meat Processing Facility - South Dakota, March-April 2020                                                       | Wrong exposure            |
|                                                                                                                      | Khanh, N. et al. Transmission of SARS-CoV 2 During Long-Haul Flight                                                                                                       | Cannot ascertain exposure |
|                                                                                                                      | Lendacki, F. et al. COVID-19 Outbreak Among Attendees of an Exercise Facility - Chicago, Illinois, August-September 2020                                                  | Wrong exposure            |
|                                                                                                                      | Mallet, Y. et al. Identification of Workers at Increased Risk of Infection During a COVID-19 Outbreak in a Meat Processing Plant, France, May 2020                        | Wrong exposure            |
|                                                                                                                      | Park, S. et al. Coronavirus Disease Outbreak in Call Center, South Korea                                                                                                  | Cannot ascertain exposure |
|                                                                                                                      | Ritger, K. et al. Community Transmission of SARS-CoV-2 at Two Family Gatherings - Chicago, Illinois, February-March 2020                                                  | Wrong exposure            |
|                                                                                                                      | Shen et al. Community Outbreak Investigation of SARS-CoV-2 Transmission Among Bus Riders in Eastern China More Detailed Studies Are Needed Reply                          | Wrong publication type    |
|                                                                                                                      | Speers, D. et al. Flight-Associated Transmission of Severe Acute Respiratory Syndrome Coronavirus 2 Corroborated by Whole-Genome Sequencing                               | Cannot ascertain exposure |
| Stein-Zamir, C. et al. A large COVID-19 outbreak in a high school 10 days after schools' reopening, Israel, May 2020 | Cannot ascertain exposure                                                                                                                                                 |                           |

| Retrieval method  | Reference                                                                                                                                                                                                                                                       | Reason for exclusion      |
|-------------------|-----------------------------------------------------------------------------------------------------------------------------------------------------------------------------------------------------------------------------------------------------------------|---------------------------|
|                   | Swadi, T. Genomic Evidence of In-Flight Transmission of SARS-CoV-2 Despite Predeparture Testing                                                                                                                                                                 | Wrong exposure            |
|                   | Szablewski, C. et al. SARS-CoV-2 Transmission Dynamics in a Sleep-Away Camp                                                                                                                                                                                     | Wrong exposure            |
|                   | Tambyah, P. et al. Community Outbreak Investigation of SARS-CoV-2 Transmission Among Bus Riders in Eastern China More Detailed Studies Are Needed                                                                                                               | Wrong publication type    |
|                   | Toyokawa, T. et al. Transmission of SARS-CoV-2 during a 2-h domestic flight to Okinawa, Japan, March 2020                                                                                                                                                       | Cannot ascertain exposure |
|                   | Waltenburg, M. et al. Update: COVID-19 Among Workers in Meat and Poultry Processing Facilities - United States, April-May 2020                                                                                                                                  | Wrong study design        |
|                   | Weissberg, D. et al. Does respiratory co-infection facilitate dispersal of SARS-CoV-2? investigation of a super-spreading event in an open-space office                                                                                                         | Wrong exposure            |
| Literature search | Aizawa, Y. et al. Coronavirus Disease 2019 Cluster Originating in a Primary School Teachers' Room in Japan                                                                                                                                                      | Cannot ascertain exposure |
|                   | Akaishi, T. et al. COVID-19 Transmission at Schools in Japan                                                                                                                                                                                                    | Wrong exposure            |
|                   | Azimi, P. et al, Mechanistic transmission modeling of COVID-19 on the Diamond Princess cruise ship demonstrates the importance of aerosol transmission                                                                                                          | Wrong study design        |
|                   | Baumgarte, S. et al. Investigation of a Limited but Explosive COVID-19 Outbreak in a German Secondary School                                                                                                                                                    | Cannot ascertain exposure |
|                   | Bielecki, M. et al, Social Distancing Alters the Clinical Course of COVID-19 in Young Adults: A Comparative Cohort Study                                                                                                                                        | Wrong outcome             |
|                   | Bohmer, M. M. et al, Investigation of a COVID-19 outbreak in Germany resulting from a single travel-associated primary case: a case series                                                                                                                      | Wrong exposure            |
|                   | Boogaard, L. H. et al. A mixed-methods approach to elucidate SARS-CoV-2 transmission routes and clustering in outbreaks in native workers and labour migrants in the fruit and vegetable packaging industry in South Holland, the Netherlands, May to July 2020 | Wrong exposure            |
|                   | Chau, N. V. V. et al, Superspreading Event of SARS-CoV-2 Infection at a Bar, Ho Chi Minh City, Vietnam                                                                                                                                                          | Wrong exposure            |
|                   | Chen, L. et al. Estimation of the SARS-CoV-2 transmission probability in confined traffic space and evaluation of the mitigation strategies                                                                                                                     | Wrong study design        |
|                   | Chen, T. et al. Epidemic characteristics of the COVID-19 outbreak in Tianjin, a well-developed city in China                                                                                                                                                    | Wrong study design        |
|                   | Chen, X. et al, Clinical features and short-term outcomes of patients with COVID-19 due to different exposure history                                                                                                                                           | Wrong exposure            |
|                   | Cheng, P. et al. Predominant airborne transmission and insignificant fomite transmission of SARS-CoV-2 in a two-bus COVID-19 outbreak originating from the same pre-symptomatic index case                                                                      | Wrong study design        |
|                   | Choe, Y. J. et al. SARS-CoV-2 transmission in schools in Korea: nationwide cohort study                                                                                                                                                                         | Wrong study design        |
|                   | Chu, D. K. W. et al. SARS-CoV-2 Superspread in Fitness Center, Hong Kong, China, March 2021                                                                                                                                                                     | Wrong exposure            |

| Retrieval method | Reference                                                                                                                                                                               | Reason for exclusion   |
|------------------|-----------------------------------------------------------------------------------------------------------------------------------------------------------------------------------------|------------------------|
|                  | Cuschieri, S. et al. Mass Events Trigger Malta's Second Peak After Initial Successful Pandemic Suppression                                                                              | Wrong study design     |
|                  | De Man, P. et al. Outbreak of Coronavirus Disease 2019 (COVID-19) in a Nursing Home Associated with Aerosol Transmission as a Result of Inadequate Ventilation                          | Wrong exposure         |
|                  | Delaugerre, C. et al. Prevention of SARS-CoV-2 transmission during a large, live, indoor gathering (SPRING): a non-inferiority, randomised, controlled trial                            | Wrong study design     |
|                  | Denpetkul, T. et al. Effects of face masks and ventilation on the risk of SARS-CoV-2 respiratory transmission in public toilets: a quantitative microbial risk assessment               | Wrong study design     |
|                  | Deresinski, S., Possible Aerosol Spread of SARS-CoV-2 in an Apartment Building                                                                                                          | Wrong publication type |
|                  | Driessche, K.V. et al, Exposure to cough aerosols and development of pulmonary COVID-19                                                                                                 | Wrong exposure         |
|                  | Ehrhardt, J. et al, Transmission of SARS-CoV-2 in children aged 0 to 19 years in childcare facilities and schools after their reopening in May 2020, Baden-Wurttemberg, Germany         | Wrong study design     |
|                  | Evangelista, H. et al, Combining science and social engagement against Covid-19 in a Brazilian Slum                                                                                     | Wrong outcome          |
|                  | Goldenfeld, M. et al. First Reported Nosocomial SARS-CoV-2 Outbreak in a Hospital-Based Laundry Facility                                                                                | Wrong exposure         |
|                  | Gupta, A. et al. A comparative analysis of control measures on-board ship against COVID-19 and similar novel viral respiratory disease outbreak: Quarantine ship or disembark suspects? | Wrong study design     |
|                  | He, F. et al, Comparative Analysis of 95 Patients with Different Severity in the Early Outbreak of COVID-19 in Wuhan, China                                                             | Wrong study design     |
|                  | Hijnen, D. et al. SARS-CoV-2 transmission from presymptomatic meeting attendee, Germany                                                                                                 | Wrong exposure         |
|                  | Ho, C., Modelling Airborne Transmission and Ventilation Impacts of a COVID-19 Outbreak in a Restaurant in Guangzhou, China                                                              | Wrong study design     |
|                  | Hu, M. et al. Transmission risk of SARS-CoV-2 on airplanes and high-speed trains                                                                                                        | Wrong exposure         |
|                  | Kang, Y. et al, A retrospective view of pediatric cases infected with SARS-CoV-2 of a middle-sized city in mainland China                                                               | Wrong study design     |
|                  | Kim, C. et al. COVID-19 Outbreak in a Military Unit in Korea                                                                                                                            | Wrong exposure         |
|                  | Kim, J. G. et al, Air evacuation of passengers with potential SARS-CoV-2 infection under the guidelines for appropriate infection control and prevention                                | Wrong outcome          |
|                  | Kolinski, J. M, et al, Superspreading events suggest aerosol transmission of SARS-CoV-2 by accumulation in enclosed spaces                                                              | Wrong study design     |
|                  | Kristiansen, M. F. et al, Epidemiology and clinical course of first wave coronavirus disease cases, faroe islands                                                                       | Wrong exposure         |
|                  | Kwon, K. S. et al, Erratum: Correction of Text in the Article "Evidence of Long-Distance Droplet Transmission of SARS-CoV-2 by Direct Air Flow in a Restaurant in Korea"                | Wrong publication type |
|                  | Lam-Hine, T. et al. Outbreak Associated with SARS-CoV-2 B.1.617.2 (Delta) Variant in an Elementary School - Marin County, California, May-June 2021                                     | Wrong exposure         |



| Retrieval method | Reference                                                                                                                                                                              | Reason for exclusion      |
|------------------|----------------------------------------------------------------------------------------------------------------------------------------------------------------------------------------|---------------------------|
|                  | Lee, B. U. A high attack rate of 90% of SARS-CoV-2 Delta variant infections in crew personnel on a single navy ship                                                                    | Wrong outcome             |
|                  | Lee, H., Ahn, K. H. Estimate of the critical exposure time based on 70 confirmed COVID-19 cases                                                                                        | Wrong study design        |
|                  | Lim, C. et al. Characteristics of Transmission Routes of COVID-19 Cluster Infections in Gangwon Province, Korea                                                                        | Wrong study design        |
|                  | Liu, S. et al. A COVID-19 Outbreak - Nangong City, Hebei Province, China, January 2021                                                                                                 | Wrong setting             |
|                  | Lotta-Maria, A. H. et al, Healthcare workers high COVID-19 infection rate: the source of infections and potential for respirators and surgical masks to reduce occupational infections | Wrong setting             |
|                  | Montecucco, A. et al. Investigating SARS-CoV-2 transmission among co-workers in a University of Northern Italy during COVID-19 pandemic: an observational study                        | Wrong exposure            |
|                  | Nsekuye, O. et al. Investigation of Four Clusters of Severe Acute Respiratory Syndrome Coronavirus 2 (SARS-CoV-2) in Rwanda, 2020                                                      | Wrong exposure            |
|                  | O'Donnell, M. T. et al. Mitigating SARS-CoV-2 in the Deployed Environment                                                                                                              | Wrong exposure            |
|                  | Pedro, N. et al. Field and Molecular Epidemiology: How Viral Sequencing Changed Transmission Inferences in the First Portuguese SARS-CoV-2 Infection Cluster                           | Wrong exposure            |
|                  | Pokora, R. et al, Investigation of superspreading COVID-19 outbreaks events in meat and poultry processing plants in Germany: A cross-sectional study                                  | Wrong exposure            |
|                  | Pringle, J. C. et al. COVID-19 in a Correctional Facility Employee Following Multiple Brief Exposures to Persons with COVID-19 - Vermont, July-August 2020                             | Wrong exposure            |
|                  | Ramirez, D. et al. COVID-19 Transmission during Transportation of 1st to 12th Grade Students: Experience of an Independent School in Virginia                                          | Wrong outcome             |
|                  | Rankin, D. A. et al, Outbreak of COVID-19 among school auction attendees: Was it a "silent auction" or "silent transmission"?                                                          | Cannot ascertain exposure |
|                  | Redditt, V. et al, Outbreak of SARS-CoV-2 infection at a large refugee shelter in Toronto, April 2020: a clinical and epidemiologic descriptive analysis                               | Wrong exposure            |
|                  | Safer, M. et al. Identification of transmission chains and clusters associated with COVID-19 in Tunisia                                                                                | Wrong study design        |
|                  | Sami S. et al, Community Transmission of SARS-CoV-2 Associated with a Local Bar Opening Event - Illinois, February 2021                                                                | Cannot ascertain exposure |
|                  | Smith, C. R. et al. COVID-19 in a remote First Nations community in British Columbia, Canada: an outbreak report                                                                       | Wrong exposure            |
|                  | Sugano, N. et al, Cluster of Severe Acute Respiratory Syndrome Coronavirus 2 Infections Linked to Music Clubs in Osaka, Japan                                                          | Wrong exposure            |
|                  | Sundar, V. et al. Low secondary transmission rates of SARS-CoV-2 infection among contacts of construction laborers at open air environment                                             | Wrong exposure            |
|                  | Szablewski, C. M. et al, SARS-CoV-2 Transmission and Infection Among Attendees of an Overnight Camp - Georgia, June 2020                                                               | Wrong exposure            |

| Retrieval method                                      | Reference                                                                                                                                                                                                      | Reason for exclusion      |
|-------------------------------------------------------|----------------------------------------------------------------------------------------------------------------------------------------------------------------------------------------------------------------|---------------------------|
|                                                       | Tsuchihashi, Y. et al. High attack rate of SARS-CoV-2 infections during a bus tour in Japan                                                                                                                    | Cannot ascertain exposure |
|                                                       | Voeten, H. A. C. M. et al. Unraveling the modes of transmission of severe acute respiratory syndrome coronavirus 2 (sars-cov-2) during a nursing home outbreak: Looking beyond the church superspreading event | Wrong exposure            |
|                                                       | Vuylsteke, B. et al. The role of airborne transmission in a large single source outbreak of SARS-CoV-2 in a Belgian nursing home in 2020                                                                       | Wrong exposure            |
|                                                       | Wada, K. et al, Infection and transmission of COVID-19 among students and teachers in schools in Japan after the reopening in June 2020                                                                        | Wrong exposure            |
|                                                       | Wagatsuma, K. et al. Genomic Epidemiology Reveals Multiple Introductions of Severe Acute Respiratory Syndrome Coronavirus 2 in Niigata City, Japan, Between February and May 2020                              | Wrong study design        |
|                                                       | Walshe, N. et al. Assessment of Environmental and Occupational Risk Factors for the Mitigation and Containment of a COVID-19 Outbreak in a Meat Processing Plant                                               | Cannot ascertain exposure |
|                                                       | Wang, Q. et al. Aerosol transmission of SARS-CoV-2 due to the chimney effect in two high-rise housing drainage stacks                                                                                          | Wrong study design        |
|                                                       | Wang, Z. et al. A coupled Computational Fluid Dynamics and Wells-Riley model to predict COVID-19 infection probability for passengers on long-distance trains                                                  | Wrong study design        |
|                                                       | Wassendorf, L. et al. Analysis of the Dynamics, Outcome, and Prerequisites of the first German SARS-CoV-2 Superspreading Event                                                                                 | Wrong exposure            |
|                                                       | Wilburn, J. et al, COVID-19 within a large UK prison with a high number of vulnerable adults, march to june 2020: An outbreak investigation and screening event                                                | Cannot ascertain exposure |
|                                                       | Wong, L. T. et al. Time-Variant Positive Air Pressure in Drainage Stacks as a Pathogen Transmission Pathway of COVID-19                                                                                        | Wrong study design        |
|                                                       | Xie, C. et al, The evidence of indirect transmission of SARS-CoV-2 reported in Guangzhou, China                                                                                                                | Wrong exposure            |
|                                                       | Xu, P. et al, Lack of cross-transmission of SARS-CoV-2 between passenger's cabins on the Diamond Princess cruise ship                                                                                          | Wrong study design        |
|                                                       | Yuan, Y. et al, Molecular epidemiology of SARS-CoV-2 clusters caused by asymptomatic cases in Anhui Province, China                                                                                            | Wrong exposure            |
|                                                       | Zhang, J. et al. Transmission of SARS-CoV-2 during air travel: a descriptive and modelling study                                                                                                               | Wrong study design        |
|                                                       | Zhang, Z. et al, Disease transmission through expiratory aerosols on an urban bus                                                                                                                              | Wrong study design        |
|                                                       | Zollner-Schwetz, I. et al. Analysis of COVID-19 outbreaks in 3 long-term care facilities in Graz, Austria                                                                                                      | Wrong exposure            |
|                                                       | Zuckerman, N. S. et al, Comprehensive Analyses of SARS-CoV-2 Transmission in a Public Health Virology Laboratory                                                                                               | Wrong exposure            |
| Comber et al, Airborne transmission of SARS-CoV-2 via | Almilaji, O., Air Recirculation Role in the Spread of COVID-19 Onboard the Diamond Princess Cruise Ship during a Quarantine Period                                                                             | Cannot ascertain exposure |
|                                                       | Bays, D.J. et al, Investigation of nosocomial                                                                                                                                                                  | Wrong setting             |

| Retrieval method                                                                                                   | Reference                                                                                                                                                                                    | Reason for exclusion      |
|--------------------------------------------------------------------------------------------------------------------|----------------------------------------------------------------------------------------------------------------------------------------------------------------------------------------------|---------------------------|
| aerosols. Rev Med Virol. 2020:e2184                                                                                | SARS-CoV-2 transmission from two patients to health care workers identifies close contact but not airborne transmission events                                                               |                           |
|                                                                                                                    | Cai, J. et al, Indirect Virus Transmission in Cluster of COVID-19 Cases, Wenzhou, China, 2020                                                                                                | Cannot ascertain exposure |
|                                                                                                                    | Zhang, R. et al, Identifying airborne transmission as the dominant route for the spread of Covid-19                                                                                          | Wrong study design        |
|                                                                                                                    | Cheng, V.C.C. et al, Air and environmental sampling for SARS-CoV-2 around hospitalized patients with coronavirus disease 2019 (Covid-19)                                                     | Wrong setting             |
|                                                                                                                    | Chia, P.Y. et al, Detection of air and surface contamination by SARS-CoV-2 in hospital rooms of infected patients                                                                            | Wrong setting             |
|                                                                                                                    | Faridi, S et al, A field indoor air measurement of SARS-CoV-2 in the patient rooms of the largest hospital in Iran                                                                           | Wrong setting             |
|                                                                                                                    | Fears, A.C. et al, Persistence of severe acute respiratory syndrome coronavirus 2 in aerosol suspensions                                                                                     | Wrong study design        |
|                                                                                                                    | Guo, Z et al, Aerosol and Surface Distribution of Severe Acute Respiratory Syndrome Coronavirus 2 in Hospital Wards, Wuhan, China, 2020                                                      | Wrong setting             |
|                                                                                                                    | Jiang, Y. et al, Clinical Data on Hospital Environmental Hygiene Monitoring and Medical Staff Protection during the Coronavirus Disease 2019 Outbreak                                        | Wrong setting             |
|                                                                                                                    | Lei, H et al, SARS-CoV-2 environmental contamination associated with persistently infected COVID-19 patients                                                                                 | Wrong setting             |
|                                                                                                                    | Liu, Y. et al, Aerodynamic analysis of SARS-CoV-2 in two Wuhan hospitals                                                                                                                     | Wrong setting             |
|                                                                                                                    | Ma, J. et al, Exhaled breath is a significant source of SARS-CoV-2 emission                                                                                                                  | Wrong outcome             |
|                                                                                                                    | Ong, S.W.X. et al, Air, surface environmental, and personal protective equipment contamination by severe acute respiratory syndrome coronavirus 2 (SARS-CoV-2) from a symptomatic patient    | Wrong outcome             |
|                                                                                                                    | Razzini, K. et al, SARS-CoV-2 RNA detection in the air and on surfaces in the COVID-19 ward of a hospital in Milan, Italy                                                                    | Wrong setting             |
|                                                                                                                    | Santarpia, J.L. et al, Aerosol and Surface Transmission Potential of SARS-CoV-2                                                                                                              | Wrong outcome             |
|                                                                                                                    | Santarpia, J.L. et al, The Infectious Nature of Patient-Generated SARS-CoV-2 Aerosol                                                                                                         | Wrong setting             |
|                                                                                                                    | Schuit, M. et al, Airborne SARS-CoV-2 is rapidly inactivated by simulated sunlight                                                                                                           | Wrong study design        |
|                                                                                                                    | Van Doremalen, N. et al, Aerosol and surface stability of SARS-CoV-2 as compared with SARS-CoV-1                                                                                             | Wrong study design        |
|                                                                                                                    | Wong, J.C.C. et al, Environmental Contamination of SARS-CoV-2 in a Non-Healthcare Setting Revealed by Sensitive Nested RT-PCR                                                                | Wrong outcome             |
|                                                                                                                    | Yamagishi T. et al, Environmental sampling for severe acute respiratory syndrome coronavirus 2 (SARS-CoV-2) during a coronavirus disease (COVID-19) outbreak aboard a commercial cruise ship | Wrong outcome             |
| Yu, L. et al, Catch and kill airborne SARS-CoV-2 to control spread of COVID-19 by a heated air disinfection system | Wrong study design                                                                                                                                                                           |                           |

| Retrieval method | Reference                                                                                                                                                | Reason for exclusion |
|------------------|----------------------------------------------------------------------------------------------------------------------------------------------------------|----------------------|
|                  | Zhou, L. et al, Detection of SARS-CoV-2 in Exhaled Breath from COVID-19 Patients Ready for Hospital Discharge                                            | Wrong setting        |
|                  | Zhou, L. et al, Investigating SARS-CoV-2 surface and air contamination in an acute healthcare setting during the peak of the COVID-19 pandemic in London | Wrong setting        |
